# Supplementary material for: Addressing the Safety of Transportation Cyber-Physical Systems: Development and Validation of a Verbal Warning Utility Scale for Intelligent Transportation Systems
Source: Hindawi journal article supplement (doi:10.1155/2015/126947), 2015-01-01
Supplement: f1 [file 126947.f1.pdf]

## Weighting Scale

Here are pairs of the properties of the message you just evaluated. Please select the item that contributes the most to the Utility (usefulness) of the message you heard

**Please select the item that contributes the most to the Utility (usefulness) of the warning you heard**

- Alertness
- Accuracy of understanding

**Please select the item that contributes the most to the Utility (usefulness) of the warning you heard**

- Accuracy of understanding
- Time to display the message

**Please select the item that contributes the most to the Utility (usefulness) of the warning you heard**

- Time to display the message
- Alertness

**Please select the item that contributes the most to the Utility (usefulness) of the warning you heard**

- Representation of event urgency
- Accuracy of understanding

**Please select the item that contributes the most to the Utility (usefulness) of the warning you heard**

- Alertness
- Representation of event urgency

**Please select the item that contributes the most to the Utility (usefulness) of the warning you heard**

- Time to display the message
- Representation of event urgency
